# Supplementary material for: Spontaneous mutations in the single TTN gene represent high tumor mutation burden
Source: PubMed Central journal article supplement (PMC7424531; doi:10.1038/s41525-019-0107-6), 2020-01-14
Supplement: 41525_2019_107_MOESM1_ESM.pdf [file 41525_2019_107_MOESM1_ESM.pdf]

## Supplementary Figure 1

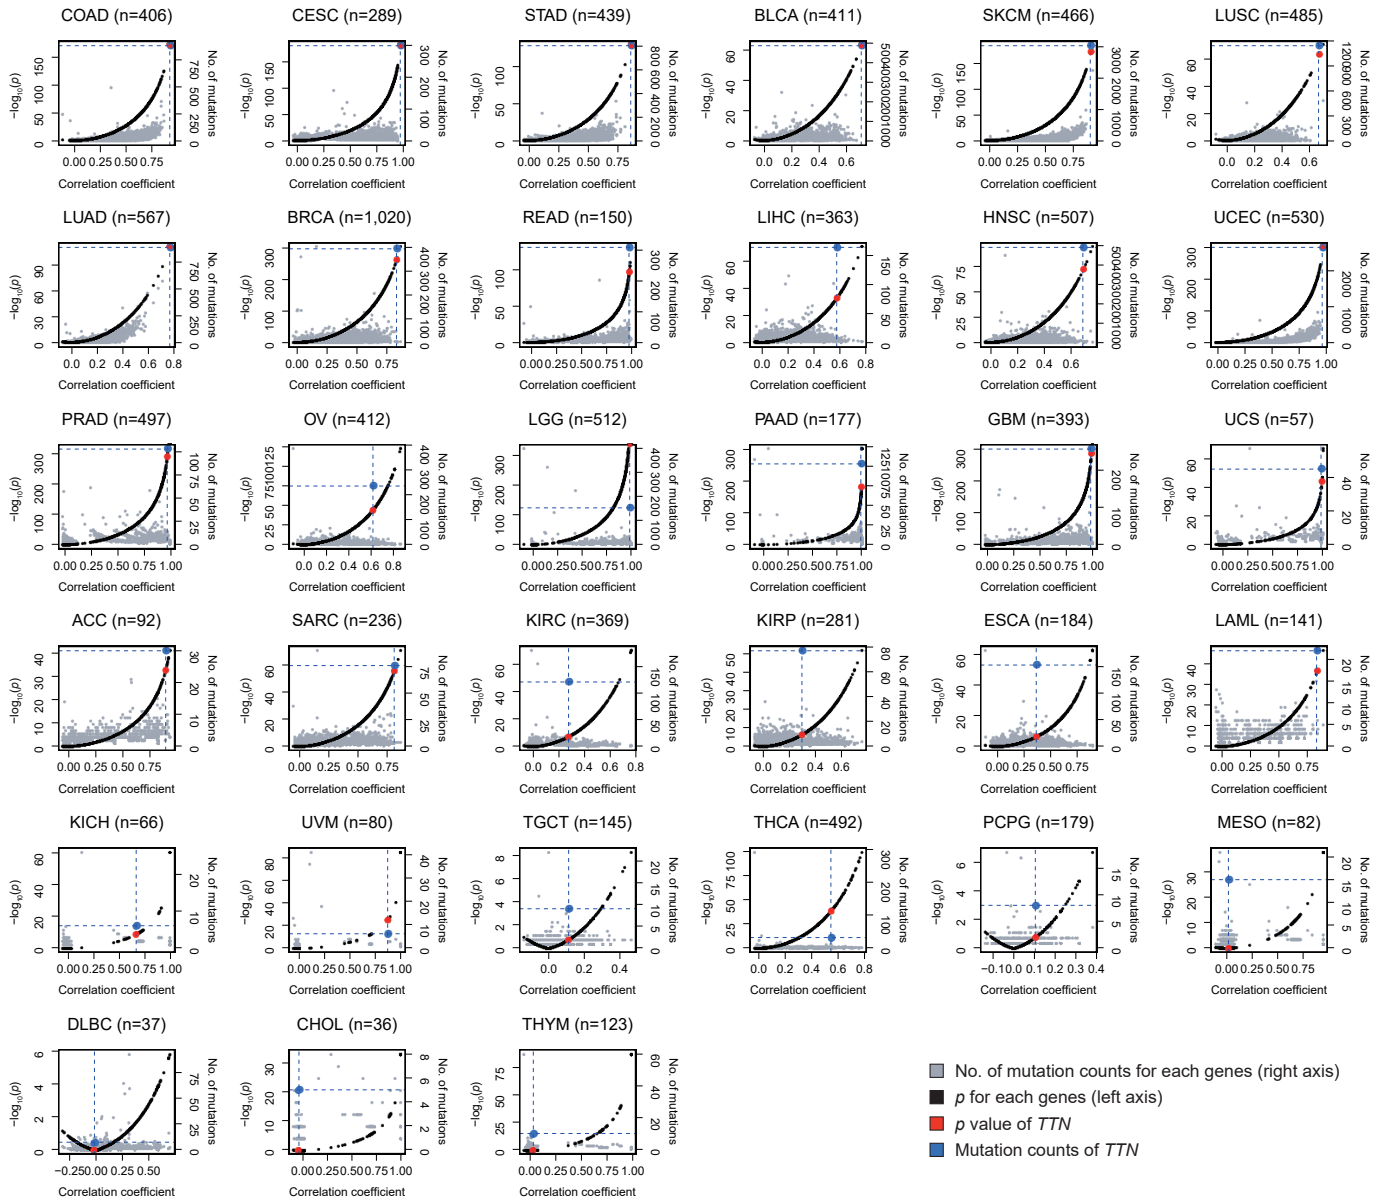

**Supplementary Figure 1. Distribution of correlation coefficients and mutation counts for all tested genes within 33 tumor types.** For each tumor type, correlation coefficients and  $p$ -values between all observed genes and total mutation counts are shown (left axis for  $p$ -values, red dot: *TTN*, black dot: others) (right axis for mutation number, blue dot: *TTN*, grey dot: others).

Supplementary Figure 2

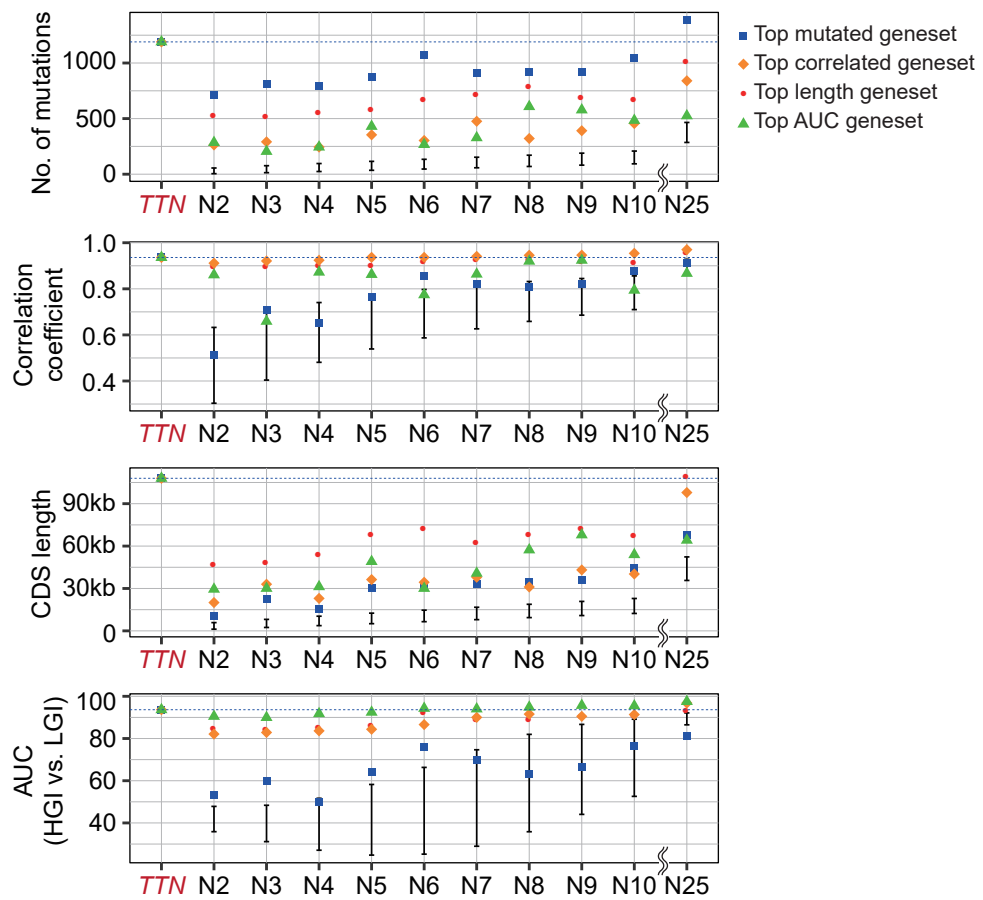

**Supplementary Figure 2.** Simulations using random combinations of multiple genes (100,000 times for each set) in comparison to TTN-TMB. N\* indicates the number of genes in a given combination.

Supplementary Figure 3

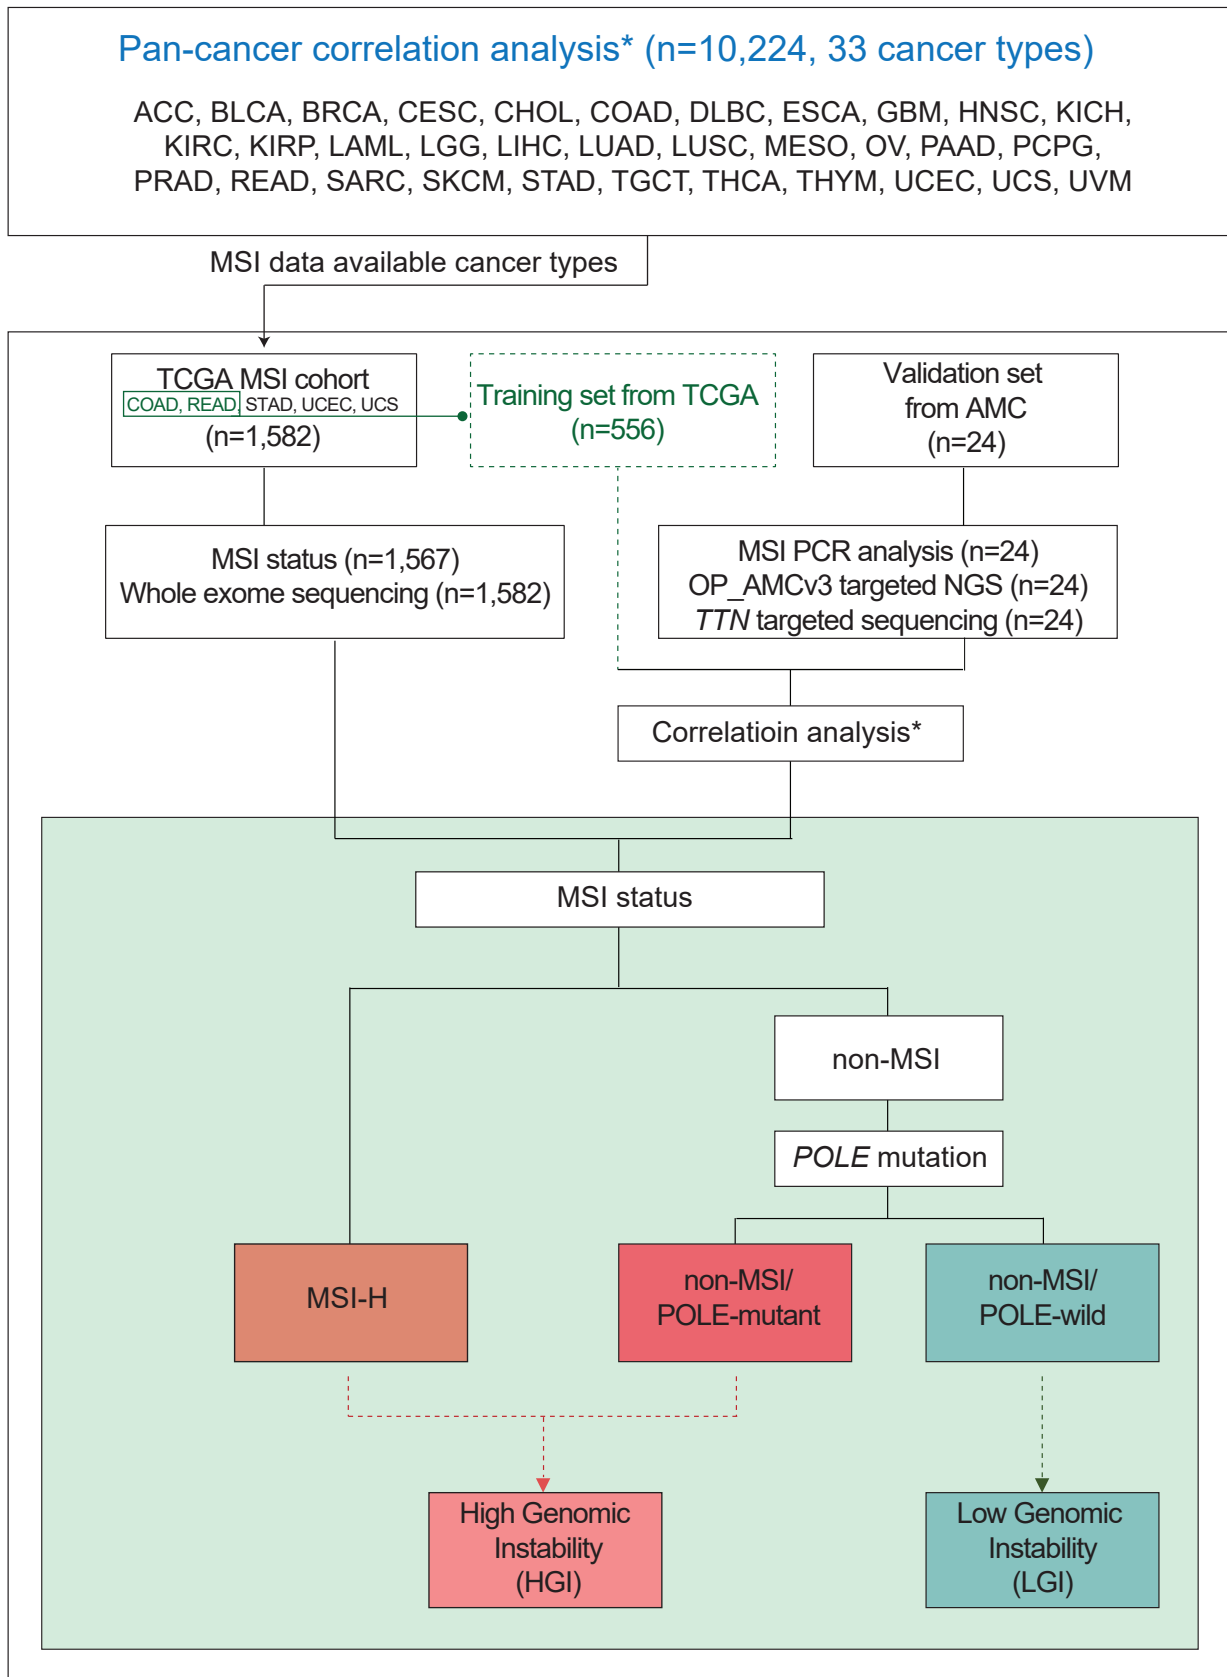

**Supplementary Figure 3.** Overall study design. Detailed correlation analysis (\*) procedures are described in Supplementary Figure 4.

## Correlation analysis

1<sup>st</sup> step. Generate Genes x Samples matrix.

|                      | Sample #1 | Sample #2 | ... | Sample #n |
|----------------------|-----------|-----------|-----|-----------|
| Gene #1              |           |           |     |           |
| Gene #2              |           |           |     |           |
| ⋮                    |           |           |     |           |
| Gene #m              |           |           |     |           |
| Total mutation count |           |           |     |           |

2<sup>nd</sup> step. Evaluate correlation, and repeat for all genes.

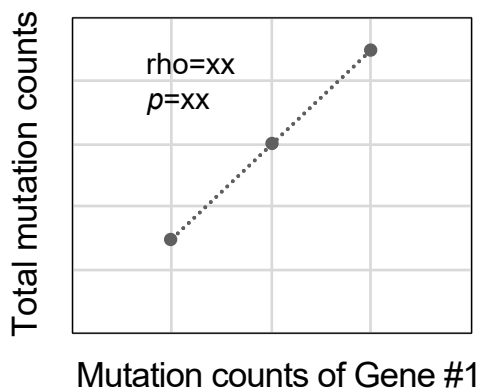

3<sup>rd</sup> step. Summarize rho and  $p$  for m genes.

|         | rho | $p$ |
|---------|-----|-----|
| Gene #1 | xx  | xx  |
| Gene #2 |     |     |
| ⋮       |     |     |
| Gene #m |     |     |

Supplementary Table 1. Overview of POLE and mismatch repair related genes mutation profiles.

| Patient | Sample Id      | Gender | Tumor                   | Age (Diagnosis) | MSI   | Three class         | Two class | POLE/POLE1 nonSyn variant | POLE/POLE1 nonSyn variant | %   | SIFT            | PolyPhen                 | MMR nonSyn variants                                 | %                 | SIFT                             | PolyPhen2                |
|---------|----------------|--------|-------------------------|-----------------|-------|---------------------|-----------|---------------------------|---------------------------|-----|-----------------|--------------------------|-----------------------------------------------------|-------------------|----------------------------------|--------------------------|
| p-611   | SMP00000000611 | F      | Mucinous Adenocarcinoma | 61              | MSH   | MSH                 | HGI       | -                         | -                         | -   | -               | -                        | -                                                   | -                 | -                                | -                        |
| p-612   | SMP00000000612 | F      | Adenocarcinoma          | 45              | MSS   | non-MSI/POLE-wild   | LGI       | -                         | -                         | -   | -               | -                        | MLH1 c.1086delC<br>MLH1 c.1968T>G<br>PMS2 c.1999G>T | 15%<br>42%<br>19% | deleterious(0)<br>deleterious(0) | probably_damaging(0.984) |
| p-613   | SMP00000000613 | M      | Adenocarcinoma          | 60              | MSI-H | MSI-H               | HGI       | POLE c.1625delG           | p.G1642A1als1er21         | 24% | tolerated(0.48) | benign(0.09)             | MSH6 c.946delA                                      | 41%               | tolerated(0.1)                   | probably_damaging(0.984) |
| p-614   | SMP00000000614 | F      | Adenocarcinoma          | 41              | MSI-H | MSI-H               | HGI       | POLE c.957>G              | p.Leu32A1iq               | 56% | tolerated(0.14) | benign(0.09)             | MSH2 c.251delA<br>MSH2 c.1721A>C                    | 23%<br>47%        | deleterious(0)                   | probably_damaging(1)     |
| p-615   | SMP00000000615 | M      | Adenocarcinoma          | 61              | MSI-H | MSI-H               | HGI       | -                         | -                         | -   | -               | -                        | MSH6 c.3261dupC                                     | 2%                | tolerated(0.1)                   | possibly_damaging(0.517) |
| p-616   | SMP00000000616 | M      | Adenocarcinoma          | 69              | MSS   | non-MSI/POLE-wild   | LGI       | -                         | -                         | -   | -               | -                        | MSH2 c.2527>G<br>MSH6 c.873_874delCA                | 14%<br>71%        | tolerated(0.6)                   | benign(0.033)            |
| p-617   | SMP00000000617 | M      | Mucinous Adenocarcinoma | 32              | MSI-H | MSI-H               | HGI       | POLE c.2683G>A            | p.Ala895Thr               | 3%  | tolerated(0.14) | probably_damaging(0.968) | MSH6 c.3261dupC<br>MSH2 c.3261dupC                  | 2%<br>29%         | deleterious(0)                   | probably_damaging(0.999) |
| p-618   | SMP00000000618 | M      | Adenocarcinoma          | 48              | MSI-H | MSI-H               | HGI       | -                         | -                         | -   | -               | -                        | MSH6 c.877C>A                                       | 4%                | tolerated(0.1)                   | benign(0.11)             |
| p-619   | SMP00000000619 | F      | Adenocarcinoma          | 53              | MSS   | non-MSI/POLE-wild   | LGI       | -                         | -                         | -   | -               | -                        | MSH2 c.505A>G                                       | 44%               | tolerated(0.6)                   | benign(0.033)            |
| p-620   | SMP00000000620 | F      | Mucinous Adenocarcinoma | 63              | MSI-H | MSI-H               | HGI       | -                         | -                         | -   | -               | -                        | MSH6 c.3261dupC                                     | 29%               | deleterious(0)                   | probably_damaging(0.999) |
| p-621   | SMP00000000621 | F      | Adenocarcinoma          | 21              | MSI-H | MSI-H               | HGI       | POLE c.1186delG           | p.Glu896Ser1sTer16        | 35% | deleterious(0)  | probably_damaging(1)     | MSH2 c.1540G>A                                      | 24%               | deleterious(0)                   | possibly_damaging(0.598) |
| p-622   | SMP00000000622 | F      | Adenocarcinoma          | 55              | MSS   | non-MSI/POLE-wild   | LGI       | -                         | -                         | -   | -               | -                        | MSH2 c.1736G>T                                      | 29%               | tolerated(0.1)                   | benign(0.004)            |
| p-623   | SMP00000000623 | F      | Adenocarcinoma          | 56              | MSI-H | MSI-H               | HGI       | -                         | -                         | -   | -               | -                        | MSH2 c.2245G>T                                      | 27%               | tolerated(0.1)                   | benign(0.004)            |
| p-624   | SMP00000000624 | F      | Adenocarcinoma          | 80              | MSI-H | MSI-H               | HGI       | -                         | -                         | -   | -               | -                        | MSH2 c.2427G>T                                      | 4%                | tolerated(0.1)                   | benign(0.004)            |
| p-625   | SMP00000000625 | F      | Adenocarcinoma          | 58              | MSS   | non-MSI/POLE-wild   | LGI       | -                         | -                         | -   | -               | -                        | MLH1 c.19delG                                       | 77%               | tolerated(0.1)                   | benign(0.004)            |
| p-626   | SMP00000000626 | M      | Adenocarcinoma          | 46              | MSS   | non-MSI/POLE-mutant | HGI       | POLE c.857C>G             | p.P1626A1ig               | 25% | deleterious(0)  | probably_damaging(1)     | MSH2 c.1540G>A                                      | 24%               | deleterious(0)                   | possibly_damaging(0.598) |
| p-627   | SMP00000000627 | M      | Adenocarcinoma          | 50              | MSI-H | MSI-H               | HGI       | POLE c.4335_4338delTGT    | p.Cys1445T1p61Ter7        | 3%  | tolerated(0.33) | benign(0.264)            | MSH2 c.1238delA                                     | 5%                | tolerated_low_confidence(0)      | benign(0.001)            |
| p-628   | SMP00000000628 | M      | Adenocarcinoma          | 58              | MSS   | non-MSI/POLE-wild   | LGI       | -                         | -                         | -   | -               | -                        | PMS2 c.18C>G                                        | 23%               | tolerated(0.6)                   | benign(0.033)            |
| p-629   | SMP00000000629 | M      | Adenocarcinoma          | 53              | MSI-H | MSI-H               | HGI       | POLE c.2927>G             | p.Leu98Val                | 50% | tolerated(0.33) | benign(0.264)            | MSH2 c.505A>G                                       | 40%               | tolerated(0.6)                   | benign(0.033)            |
| p-630   | SMP00000000630 | M      | Adenocarcinomas (x2)    | 68              | MSS   | non-MSI/POLE-wild   | LGI       | -                         | -                         | -   | -               | -                        | MSH6 c.4068_4071dupGAT                              | 58%               | deleterious(0.01)                | possibly_damaging(0.658) |
| p-631   | SMP00000000631 | F      | Adenocarcinoma          | 45              | MSI-H | MSI-H               | HGI       | POLE c.6086delG           | p.Ala2030P1o1sTer18       | 32% | tolerated(0.45) | benign(0.005)            | MLH1 c.2249A>G                                      | 5%                | deleterious(0)                   | possibly_damaging(0.658) |
| p-632   | SMP00000000632 | M      | Adenocarcinoma          | 62              | MSS   | non-MSI/POLE-wild   | LGI       | -                         | -                         | -   | -               | -                        | MSH6 c.3261dupC                                     | 24%               | deleterious(0)                   | probably_damaging(1)     |
| p-633   | SMP00000000633 | F      | Adenocarcinoma          | 46              | MSI-H | MSI-H               | HGI       | POLE c.6145A>G            | p.Thr2049Ala              | 4%  | tolerated(0.45) | benign(0.005)            | MSH6 c.3261dupC                                     | 24%               | deleterious(0)                   | probably_damaging(1)     |
| p-634   | SMP00000000634 | F      | Adenocarcinoma          | 69              | MSS   | non-MSI/POLE-wild   | LGI       | -                         | -                         | -   | -               | -                        | MLH1 c.1900G>T                                      | 5%                | deleterious(0)                   | probably_damaging(1)     |

Supplementary Table 2. Comparison between TTN sequencing and targeted gene panel sequencing

|                                                       | <i>TTN</i> sequencing     | Targeted sequencing (OncoPanel AMC v3) |
|-------------------------------------------------------|---------------------------|----------------------------------------|
| <b>Cost</b>                                           |                           |                                        |
|                                                       | 300 USD (352,850 KRW)     | 300 USD (352,850 KRW)                  |
| <b>Size</b>                                           |                           |                                        |
| Target territory (base pair)                          | 107,976                   | 903,542                                |
| Total reads (mean $\pm$ SD)                           | 2,422,547 $\pm$ 430,671.9 | 9,015,647 $\pm$ 1,205,894              |
| Mean target coverage (mean $\pm$ SD)                  | 296.7652 $\pm$ 102.4071   | 165.5416 $\pm$ 42.42927                |
| Percent target bases of 100X (mean $\pm$ SD)          | 0.953154 $\pm$ 0.1122055  | 0.7386273 $\pm$ 0.1345896              |
| <b>Time</b>                                           |                           |                                        |
| From raw fastq to final bam (8 cores used in mapping) | 5m 35s $\pm$ 58s          | 9m 7s $\pm$ 1m 21s                     |
| Variant calling                                       | 44s $\pm$ 12s             | 3m 20s $\pm$ 42s                       |

SD, standard deviation

Supplementary Table 3. The 33 cancer types from TCGA.

|    | Cancer types | Disease name                                    | No. of patients | MSI status information | MSI status without NA, indeterminate | Note |
|----|--------------|-------------------------------------------------|-----------------|------------------------|--------------------------------------|------|
| 1  | ACC          | Adrenocortical carcinoma                        | 92              |                        |                                      |      |
| 2  | BLCA         | Bladder urothelial carcinoma                    | 411             |                        |                                      |      |
| 3  | BRCA         | Breast invasive carcinoma                       | 1,020           |                        |                                      |      |
| 4  | CESC         | Cervical and endocervical cancers               | 289             |                        |                                      |      |
| 5  | CHOL         | Cholangiocarcinoma                              | 36              |                        |                                      |      |
| 6  | COAD         | Colon adenocarcinoma                            | 406             | yes                    | 402                                  | CRC  |
| 7  | DLBC         | Lymphoid neoplasm diffuse large B-cell lymphoma | 37              |                        |                                      |      |
| 8  | ESCA         | Esophageal carcinoma                            | 184             |                        |                                      |      |
| 9  | GBM          | Glioblastoma multiforme                         | 393             |                        |                                      |      |
| 10 | HNSC         | Head and neck squamous cell carcinoma           | 507             |                        |                                      |      |
| 11 | KICH         | Kidney chromophobe                              | 66              |                        |                                      |      |
| 12 | KIRC         | Kidney renal clear cell carcinoma               | 369             |                        |                                      |      |
| 13 | KIRP         | Kidney renal papillary cell carcinoma           | 281             |                        |                                      |      |
| 14 | LAML         | Acute myeloid leukemia                          | 141             |                        |                                      |      |
| 15 | LGG          | Brain lower grade glioma                        | 512             |                        |                                      |      |
| 16 | LIHC         | Liver hepatocellular carcinoma                  | 363             |                        |                                      |      |
| 17 | LUAD         | Lung adenocarcinoma                             | 567             |                        |                                      |      |
| 18 | LUSC         | Lung squamous cell carcinoma                    | 485             |                        |                                      |      |
| 19 | MESO         | Mesothelioma                                    | 82              |                        |                                      |      |
| 20 | OV           | Ovarian serous cystadenocarcinoma               | 412             |                        |                                      |      |
| 21 | PAAD         | Pancreatic adenocarcinoma                       | 177             |                        |                                      |      |
| 22 | PCPG         | Pheochromocytoma and paraganglioma              | 179             |                        |                                      |      |
| 23 | PRAD         | Prostate adenocarcinoma                         | 497             |                        |                                      |      |
| 24 | READ         | Rectum adenocarcinoma                           | 150             | yes                    | 150                                  | CRC  |
| 25 | SARC         | Sarcoma                                         | 236             |                        |                                      |      |
| 26 | SKCM         | Skin cutaneous melanoma                         | 466             |                        |                                      |      |
| 27 | STAD         | Stomach adenocarcinoma                          | 439             | yes                    | 439                                  |      |
| 28 | TGCT         | Testicular germ cell tumors                     | 145             |                        |                                      |      |
| 29 | THCA         | Thyroid carcinoma                               | 492             |                        |                                      |      |
| 30 | THYM         | Thymoma                                         | 123             |                        |                                      |      |
| 31 | UCEC         | Uterine corpus endometrial carcinoma            | 530             | yes                    | 520                                  |      |
| 32 | UCS          | Uterine carcinosarcoma                          | 57              | yes                    | 56                                   |      |
| 33 | UVM          | Uveal melanoma                                  | 80              |                        |                                      |      |
|    |              |                                                 | 10,224          |                        | 1,567                                |      |

**Supplementary Data 1.** Correlation coefficient of all tested genes for each tumor type.

**Supplementary Data 2.** The most highly mutated genes for each tumor type.

**Supplementary Data 3.** Result of correlation analysis in TCGA colorectal cancer (CRC) cohort.
